# Supplementary material for: Incidence of Febrile Neutropenia in Newly Diagnosed Acute Myeloid Leukaemia Patients during Intensive Induction Chemotherapy: A Systematic Review and Meta-Analysis
Source: Research Square preprint supplement (doi:10.21203/rs.3.rs-8456536/v1), 2026-01-07
Supplement: Supplementary file 2 [file 5a4522e0da67f31f7e00afd9.xlsx]

## Sheet: Study Characteristics
Study ID	Fist Author	Year of Publication	Title	Country/Region of the study	Journal and indexed	Setting (Single or multicentered)	Study Design	Study population	Total Sample Size	Study duration	Funding source	Confilct of Interest
1	Vaezi M etal	2017	A. Comparison of 60 and 80 mg/m² of daunorubicin in induction therapy of acute myeloid leukaemia.	Iran	Hematological Oncology.	Single center	Parallel-group, open-label, single-centre RCT	Adult De novo (newly diagnosed) AML;	114 patients	Recruitment June 2012 – December 2013	None	None
2	Penthinapong etal	2023	Incidence and risk factors associated with febrile neutropenia in acute myeloid leukemia patients during induction phase	Thailand (Maharaj Nakorn Chiang Mai Hospital)	Thai Journal of Pharmaceutical Sciencesas Scopus-indexed (not PubMed indexed)	Single center (university-affiliated hematology center)	Retrospective observational cohort	Adults ≥15 years with newly diagnosed AML receiving idarubicin + cytarabine induction (3+7 or 2+5)	141 patients- denovo	January 2008 – December 2021	Not declared	none
3	Kato etal	2018	Infectious complications in adults undergoing intensive chemotherapy for acute myeloid leukemia in 2001–2005 using the Japan Adult Leukemia Study Group AML201 protocols	Japan	Supportive Care in Cancer (Springer)	(multicenter, JALSG network)	Retrospective analysis of case report forms nested within the JALSG AML201 protocols (first-line treatment)	Adults with de novo AML (APL excluded)15–64 years	Evaluable for remission-induction analysis: n=980Evaluable for consolidation analysis: n=750	December 2001 – December 2005	Supported in part by a grant from the Japan Adult Leukemia Study Group (JALSG)	Several authors report grants/honoraria; others none declared.

## Sheet: Patinet Demographics
Study ID	Denovo	Replapsed	Refractory	Secondary AML	Not specified	Sex Distribution	Age Distribution	Co morbidities
1 Vaezi M etal	Y	N	N	N	N	Male: 64 (56.1%), Female: 50 (43.9%)	Median age 33 years (range 15–60)	ECO<2 and normal hepatic and renal, cardiac functions. study inclusion criteria excluded patients with “severe concurrent medical disorders”
2 Penthinapong etal	y	n	n	n	n	Female 82 (58.2%), Male 59 (41.8%)	Mean 40.7 years (SD 13.4)	Charlson comorbidity index – most common score 0 (56%)ECOG 1–2 in 92.2%
3.Kato etal	y	n	n	n	n	Male 60.0%, Female 40.0%	Median 47 years (IQR 34–55)	Patients with renal dysfunction (serum creatinine, ≥ 2 mg/dL), liver dys function (serum total bilirubin, ≥ 2.0 mg/dL), or deterioration in performance status (≥ 4) according to the Eastern Cooperative Oncology Group criteria were excluded

## Sheet: Treatment Deatils
Study ID	Chemotherapy regimen	Phase of treatment (Induction, consolidation)
Vaezi M etal	Intensive “7+3” regimen: cytarabine 100 mg/m²/day ×7 days (continuous infusion) + daunorubicin (either 60 mg/m² ×3 or 80 mg/m² ×3)	Induction
Penthinapong etal	3+7 regimen (116 patients, 82.3%) 2+5 regimen (25 patients, 17.7%)	Induction (first cycle only)
Kato etal	Induction regimens (randomized):IDA arm: Idarubicin 12 mg/m²/day ×3 + Ara-C 100 mg/m²/day ×7 (continuous infusion)DNR arm: Daunorubicin 50 mg/m²/day ×5 + Ara-C 100 mg/m²/day ×7 (continuous infusion)Second induction with same regimen if no CR after course 1. Consolidation (randomized): HDAC: Ara-C 2 g twice daily ×5 days, up to 3 courses AML201D (multiagent): 4 courses of standard-dose Ara-C–based…	Induction plus consolidation- FN incidencegiven seperagtely

## Sheet: Out 1 -Incidence and Prevelance
	Study ID	Unit of analysis (per-patient / per-cycle)	Tyoe of incidence by AML category and treatment phase	Incidence %			Definition usesd to identify FN, Neutropenic sepsis	Mean neutrophil count at diagnosis	Time to Risk window
				Numerator (N with FN)	Denominator (N patients or N cycles in that subgroup)	%
1	Vaezi M etal	Per-patient	Newly diagnosed AML, induction chemotherapy	114	114	100% (114/114 developed febrile neutropenia during induction)	Not explicitly defined	Not reported	Induction period until neutrophil recovery; exact time-at-risk window not explicitly defined
2	Penthinapong etal	Per-patient	Newly diagnosed AML, induction chemotherapy	125	141	0.887	NCCN/IDSA –	NA	From day 1 of induction chemotherapy until neutrophil recovery
3	Kato etal	per patient	Newly diagnosed AML, induction chemotherapy	786	980	0.802	FN was reported according to the NCI Cancer Therapy Evaluation Program v2.0 (1999) criteria.Defined as fever of unknown origin without clinically or microbiologically documented infection, grade III or IV	Not provided.	rom start of chemotherapy course until recovery of counts / end of hospitalization
									57
									.

## Sheet: Full text list 
Study name	UMW decision with reason	IW decision with reason
1.A Prospective Observational Study: Levofloxacin or Moxifloxacin for Quinolone Prophylaxis in AML Patients?	d as febrile neutropenia incidence was not reported separately for de novo AML patients; data were pooled across mixed hematologic malignancies
2. Moxifloxacin versus levofloxacin or ciprofloxacin prophylaxis in acute myeloid leukemia patients receiving chemotherapy.	febrile neutropenia incidence was not reported separately for de novo AML patients; only aggregate AML data were provided.
3.Comparison of antibiotic prophylaxis with cotrimoxazole/colistin (COT/COL) versus ciprofloxacin (CIP) in patients with acute myeloid leukemia.-	febrile neutropenia incidence was not reported separately for de novo AML patients receiving induction therapy; focus was on antibiotic prophylaxis comparison.”
4.A comparison of levofloxacin and oral third-generation cephalosporins as antibacterial prophylaxis in acute leukaemia patients during chemotherapy-induced neutropenia.-	ebrile neutropenia incidence was not reported separately for de novo AML patients; only aggregate AML data were provided
.5.Comparison of 60 and 80 mg/m2 of daunorubicin in induction therapy of acute myeloid leukaemia.	Included
6.Infections of Venetoclax-Based Chemotherapy in Acute Myeloid Leukemia: Rationale for Proper Antimicrobial Prophylaxis.	as it is a review article without original data on febrile neutropenia incidence in de novo AML patients.”
7.Azacitidine and Venetoclax in Previously Untreated Acute Myeloid Leukemia.-	Excluded as both denovo and secondary AML is there and cant separate denovo FN incidence
8.CLINICAL CHARACTERISTICS AND OUTCOME OF PATIENTS RECEIVING VENETOCLAX-BASED REGIMENS IN BRAZIL: A REAL-WORLD STUDY –	conference papers
9. Efficacy and safety of venetoclax and azacytidine for acute myeloid leukemia: a retrospective, single-center study-	included good
10. Real-world data on treatment outcomes and infectious complications under therapy with Venetoclax and a Hypomethylating Agent in patients with Acute myeloid leukemia (VenReal-INFECT)	NOT AVAILABLE
11. Assessment of Reduced Duration of Venetoclax in Combination with Azacytidine in Patients with Acute Myeloid Leukemia
12.AML-284 Feasibility of Outpatient Induction in Adolescent and Adult Acute Patients With Mconference papersyeloid Leukemia in a High-Volume Centre –	conference paper
13.Clinical and Microbiological Characteristics of Febrile Neutropenia During Induction Chemotherapy in Adults With Acute Leukemia –	Included good (both AML ALL)
14.Clinical Outcomes and Determinants of Survival in Patients with Hematologic Malignancies Admitted to Intensive Care Units with Critical Illness-	Excluded - only ICU patients with severe infections
15.An Emergent Change in Epidemiologic and Microbiological Characteristics of Bloodstream Infections in Adults With Febrile Neutropenia Resulting From Chemotherapy for Acute Leukemia and Lymphoma at Reference Centers in Chile, Ecuador, and Peru	Excluded – because the study population is mixed (includes relapsed/refractory AML, venetoclax-based low-intensity regimens), and it does not provide extractable data on FN incidence in de novo AML induction.
16.Successful Management of Neutropenic Sepsis Is Key toBetter Survival of Patients With Blood Cancer in Sri Lanka:Real-World Data From the Resource-Limited Setting	Excluded: Study includes all hematological malignancies; does not report FN incidence separately for de novo AML induction.”
17.Mortality in patients with hematological malignancies, febrile neutropenia, and septic shock	Excluded -ocused on outcomes and prognostic factors in patients with febrile neutropenia and septic shock across all hematological malignancies, without specifying the incidence of febrile neutropenia in de novo AML patients undergoing induction chemotherapy
18. Comparison of regimens targeting complete remission in the first-line treatment of acute myeloid leukemia patients	Although the study reports on AML patient numbers and compares induction regimens, it does not specify how many patients had de novo AML, nor does it provide FN incidence stratified for de novo AML patients
19. Venetoclax combined with daunorubicin and cytarabine (2 + 6) as induction treatment in adults with newly diagnosed acute myeloid leukemia: a phase 2, multicenter, single-arm trial	Included- this trial clearly specifies de novo AML cases and reports the number who developed febrile neutropenia.
20 .Levofloxacin to Prevent Bacterial Infection in Patients with Acute Myeloid Leukemia Treated By Azacitidine and Venetoclax: A Study from the Dataml Registry-	Excluded: FN incidence not reported separately for de novo AML patients; study reports overall FN in mixed AML cohorts (newly diagnosed, relapsed, refractory) treated with VEN + AZA
21. Idarubicin Plus Azacitidine + Venetoclax As Induction Therapy Achieved High Remission in Elderly Fit- Acute Myeloid Leukemia Patients: Preliminary Results of a Phase II Study	conference paper
22. .A Phase 2 Study of the Fully Oral Combination of ASTX727 (Decitabine/Cedazuridine) Plus Venetoclax for Older and/or Unfit Patients with Acute Myeloid Leukemia	conference abstract
23..A Retrospective Comparative Analysis of Intensive Vs. Non-Intensive Chemotherapy in Treatment Naïve Acute Myeloid Leukemia (AML) Patients in India	conference abstract
24.A Randomized Phase 2 Trial of 28-Day (Arm A) Versus 14-Day (Arm B) Schedule of Venetoclax + Azacitidine in Newly Diagnosed Acute Myeloid Leukemia Patients ≥ 60 Years	conference paper
25.Infectious Complications in Acute Myeloid Leukemia (AML) Patients Undergoing Induction Chemotherapy With Fludarabine/Cladribine, Cytarabine, and Idarubicin (FIA/CLIA): A Single‑Center Retrospective Study	abstract
26.Impact of treatment intensity on infectious complications in patients with acute myeloid leukemia	excluded-study reported infectious complications (FUO, bloodstream infection, pneumonia, IFD) but did not provide overall febrile neutropenia frequency or incidence in de novo AML patients.”
27.Induction mortality rate in elderly AML patients treated with venetoclax/azacitidine compared to standard induction chemotherapy	Induction mortality rate in elderly AML patients treated with venetoclax/azacitidine compared to standard induction chemotherapy
28.Levofloxacin Prophylaxis Versus no Prophylaxis in Acute Myeloid Leukemia DuringPost-Induction Aplasia: a Single Center Study	“Excluded: Although FN incidence was reported during induction chemotherapy, the study did not provide data separately for de novo AML patients.”
29.Incidence and risk factors associated with febrile neutropenia in Incidence and risk factors associated with febrile neutropenia in acute myeloid leukemia patients during induction phase	Included- this trial clearly specifies de novo AML cases and reports the number who developed febrile neutropenia.
30. Real World Effectiveness of “7 + 3” Intensive Chemotherapy Vs Venetoclax and Hypomethylating Agent for Initial Therapy in Adult Acute Myeloid Leukemia	Abstract
31..Inpatient Burden and Clinical Outcomes of Febrile Neutropenia in Cancer Patients: A National Inpatient Sample Database Analysis	Absttract
32..Efficacy and safety of decitabine combined with HAAG (homoharringtonine, aclarubicin, low-dose cytarabine and G-CSF) for newly diagnosed acute myeloid leukemia	“Excluded: Study population included newly diagnosed AML patients treated with DAC+HAAG, but febrile neutropenia incidence was not reported separately (only overall infection rates); also included therapy-related AML cases.”
33..Febrile neutropenia in patients with hematological malignancies receiving chemotherapy	Excluded: The study included hematological malignancies with AML comprising most FN episodes, but did not specify de novo AML numbers or provide FN incidence specifically for de novo AML during induction.”
34.Real-world challenges in the management of acute myeloid leukemia: a single-center experience from North India	TO be downloaded
35.Phase II Study of Venetoclax Added to Cladribine Plus Low-Dose Cytarabine Alternating With 5-Azacitidine in Older Patients With Newly Diagnosed Acute Myeloid Leukemia	N reported only for the overall newly diagnosed AML cohort (33/60, 55%) across the first two courses; no separate FN incidence for de novo AML provided.
36.Quizartinib (Quiz) with Decitabine (DAC) and Venetoclax (VEN) Is Highly Active in Patients (pts) with FLT3-ITD Mutated Acute Myeloid Leukemia (AML) - RAS/MAPK Mutations Continue to Drive Primary and Secondary Resistance	Abstract
37.A Phase 1 Study Evaluating ASTX727 (decitabine and cedazuridine) and Venetoclax Combination Therapy in Newly Diagnosed AML Patients Unfit for Intensive Induction Chemotherapy	abstract
38.Venetoclax Combined with FLAG-IDA Induction and Consolidation in Newly Diagnosed Acute Myeloid Leukemia	Excluded: Although FN incidence was reported for the overall newly diagnosed AML cohort (20/45, 44%), the study did not provide separate febrile neutropenia data for de novo AML patient
39.Effectiveness and Security of a Modified CALGB10403 in Adolescents and Young Adults with Acute Lymphoblastic Leukemia in Low-and-Middle-Income Countries: A Multicentric Experience in Central America	ALL excluded
40 The efficacy of antibiotic prophylaxis in AML patients undergoing induction chemotherapy	To be downloaded
41.Safety and short-term efficacy of venetoclax combined with azacitidine in acute myeloid leukemia: A single institution experience	excluded -FN: Overall cohort only (40%), no stratification by de novo AML” in
42.INTERIM RESULTS OF PROSPECTIVE OBSERVATIONAL SEIFEM STUDY ON CLINICAL OUTCOME AND INFECTIOUS COMPLICATIONS IN 230 UNFIT AML PATIENTS TREATED IN FIRST-LINE WITH HYPOMETHYLATING AGENTS ALONE OR IN COMBINATION WITH VENETOCLAX	“Excluded: Study included both de novo (52%) and secondary AML (48%); FN reported overall (38%) but not stratified by de novo AML induction.”?
43.AML-204: Venetoclax Combined with FLAG-IDA Induction and Consolidation in Newly Diagnosed Acute Myeloid Leukemia	duplicate - already excluded
44.Infection profile and outcomes of adult acute leukemia patients developing chemotherapyassociated febrile neutropenia at the philippine general hospital	excluded - conference paper
45.DAC+CAG Compared with the Standard 3+7 Regimen for Induction of the Medically Fit Elderly Acute Myeloid Leukemia: An Open-Label, Multicenter, Randomized, Phase III Trial45	dverse events reported as infections/septicemia but febrile neutropenia incidence not provided.”
46.Evaluating Acute Myeloid Leukemia Induction Regimens in Elderly Patients with Unfavorable Risk Cytogenetics That Are Candidates for Intensive Remission Therapy	poster
47.Phase II trial of CPX-351 in patients with acute myeloid leukemia at high risk for induction mortality	FN reported only for the overall newly diagnosed high-risk AML cohort on CPX-351 (19/56, 34%); no separate FN incidence for de novo AML during induction.
48.AML-225: Identification of Predictors for Uncomplicated, Low-Risk Febrile Neutropenia (FN) Admissions for Patients with Acute Myeloid Leukemia (AML) Following Intensive Chemotherapy	outcomes described (LOS, ICU, infections, mortality), but no incidence in de novo AML induction (numerator/denominator)
49.Venetoclax plus LDAC for newly diagnosed AML ineligible for intensive chemotherapy: a phase 3 randomized placebo-controlled trial	Febrile neutropenia reported overall (32% vs 29%) but not stratified for de novo AML induction; treatment regimen is low-dose cytarabine (non-intensive).”
50.A phase 3 study of venetoclax plus low-dose cytarabine in previously untreated older patients with acute myeloid leukemia (viale-C): A 6-month update	conference abstract
51. Venetoclax added to cladribine, idarubicin, and cytarabine with or without a FLT3 inhibitor in newly diagnosed acute myeloid leukemia	FN incidence (74% during induction) reported for the whole cohort (AML + MDS/MPAL). Does not provide separate incidence data for de novo AML patients.”
52.Flugaza trial: A phase III randomized, open label study comparing azacitidine versus fludarabine and cytarabine (Fluga Scheme) in elderly patients with newly diagnosed acute myeloid leukemia	conference paper
53.Safety run-in cohort 1 of gimema AML1718: A safety run-in and phase 2 open-label study of venetoclax, fludarabine, cyratabine and idarubicine (V-FLAI) in induction therapy of acute myeloid leukemia	abstract
54.Venetoclax (Ven) added to intensive chemo with cladribine, idarubicin, and AraC (CLIA) achieves high rates of durable complete remission with low rates of measurable residual disease (MRD) in pts with newly diagnosed acute myeloid leukemia (AML)	abstract
55.Efficacy and Safety Evaluation of Elderly Patients with AML Based on Clinical Common Chemotherapy Regimens Under Real-World Events	does not directly report febrile neutropenia incidence. It only reports neutropenia duration and infection rates, from which FN cannot be extracted as a precise figure
56.Management of Neutropenia during Venetoclax-Based Combination Treatment in Patients with Newly Diagnosed Acute Myeloid Leukemia	excluded, it’s a review paper
57.Infectious complications in adults undergoing intensive chemotherapy for acute myeloid leukemia in 2001-2005 using the Japan Adult Leukemia Study Group AML201 protocols	Included very relevant
58.Off-Label Use of Venetoclax in Patients With Acute Myeloid Leukemia: Single Center Experience and Data From Pharmacovigilance Database	Reports FN incidence overall (50%) and by HMA backbone (DEC vs AZA), but does not provide separate FN incidence for de novo AML patients.”
59.Treatment-Related Mortality From Infectious Complications in an Acute Leukemia Clinic	Mixed acute leukemia cohort. Reports FN-related infectious mortality (e.g., 22 AML deaths, 7 during induction) but does not provide FN incidence with numerator/denominator for newly diagnosed AML.”
60.Infectious complications in adult leukemic patients with prolonged neutropenia undergoing induction chemotherapy	Excluded: Reports infectious complications in acute leukemia during induction neutropenia, but does not report febrile neutropenia incidence
61.Decitabine combined with HAAG as induction chemotherapy for newly diagnosed acute myeloid leukemia	Newly diagnosed AML cohort (DAC+HAAG vs IA), but only reports infection rates (grade 3–4 infections) and not febrile neutropenia incidence.”
62. A real-world study of infectious complications of venetoclax combined with decitabine or azacitidine in adult acute myeloid leukemia	excluded-aper does not provide a clear, separate FN incidence in de novo AML, only grouped infectious complication dat
63.Timed sequential therapy with high-dose cytarabine and mitoxantrone as an induction regimen for acute myeloid leukemia: An update on adverse events	abstract
64.Chemotherapy and venetoclax in elderly aml trial (Caveat): A phase 1B dose escalation study examining modified intensive chemotherapy in fit elderly patients	Excluded-N incidence is reported only at the cohort level (28/51 in induction, 7/36 in consolidation). The paper does **not provide FN incidence separately
65.Analysis of infections and use of antimicrobials in patients under-going intensive induction chemotherapy for newly diagnosed acute myelogenous leukemia	conference abstract
66.Phase 1/2 study of venetoclax with low-dose cytarabine in treatment-naive, elderly patients with acute myeloid leukemia unfit for intensive chemotherapy: 1-year outcomes	abstract
67.Efficacy observation of standard-dose IA regimen in treatment of ≥ 55 years old newly diagnosed patients with acute myeloid leukemia	abstract
68.Incidence, epidemiology and microbiologic spectrum of febrile neutropenia in acute myeloid leukemia: A retrospective analysis in 1048 neutropenic febrille episodes in a single centre	abstract
69.Updated safety and efficacy results of phase 1/2 study of venetoclax plus low-dose cytarabine in treatment-naive acute myeloid leukemia patients aged ≥65 years and unfit for standard induction therapy	abstract
70.Ten-day decitabine as induction therapy for older patients with acute myeloid leukemia fit for intensive chemotherapy	conference abstract
71.Efficacy and toxicity of induction therapy with cladribine, idarubicin, and cytarabine (IAC) for acute myeloid leukemia	excluded -Does not separate FN incidence for de novo AML only (mixed AML + HR-MDS/CMML cohort).
72.Factors Associated with Survival Outcomes of Febrile Neutropenia in Hematologic Malignancy Patients	conference abstract
73.Efficacy and Safety of Decitabine in Chinese Elderly Patients with Acute Myeloid Leukemia (AML): Results Analysis of DACOGENAML2003	abstract
74.Overall survival (OS) and clinical outcomes in older patients with acute myeloid leukemia (AML) treated with azacitidine (AZA) or low-dose cytarabine (LDAC) in the AZA-AML-001 study	conference abstract
75.Impact of chemotherapy regimens with escalated anthracyclines on incidence of febrile neutropenia in patients with acute myeloid leukemia	conference abstract
76. Infectious complications in AML patients treated with induction vs. hypomethylating therapy	Excluded as FN reported both for denovo and secondary AML
